# Supplementary material
Source: Springer Nature journal article supplement (https://www.springermedizin.de/resource/supplementary/13023_2013_558_MOESM7_ESM.pdf/9642778)

*zf.thoc6*

**A**

24hpf

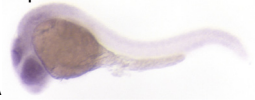

**B**

48hpf

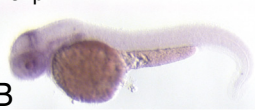

**C**

72hpf

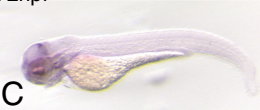

Supplement: MOESM7 [file 9642778]
